# Supplementary material
Source: Springer Nature journal article supplement (https://www.springermedizin.de/resource/supplementary/12885_2012_3905_MOESM5_ESM.pdf/9464704)

**A**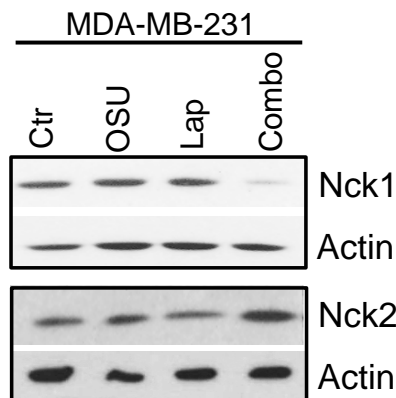**B**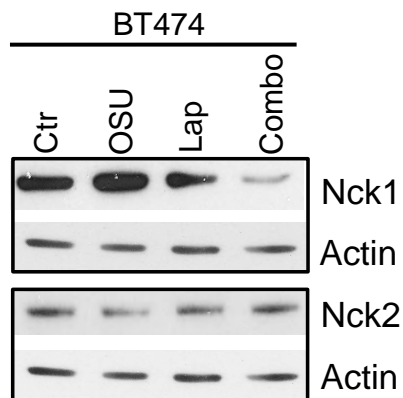**C**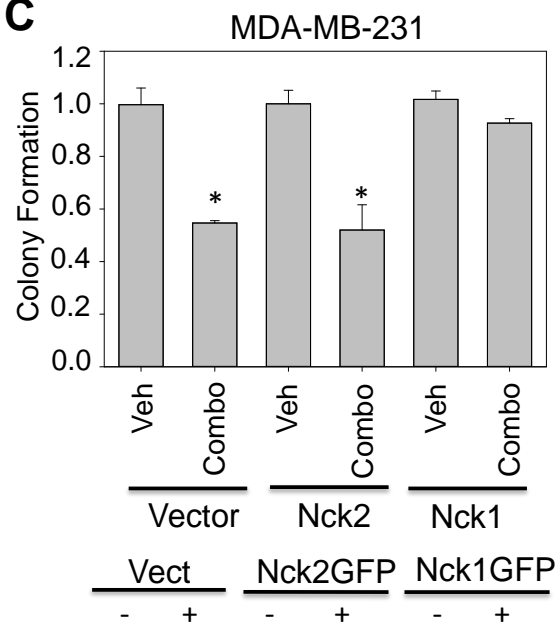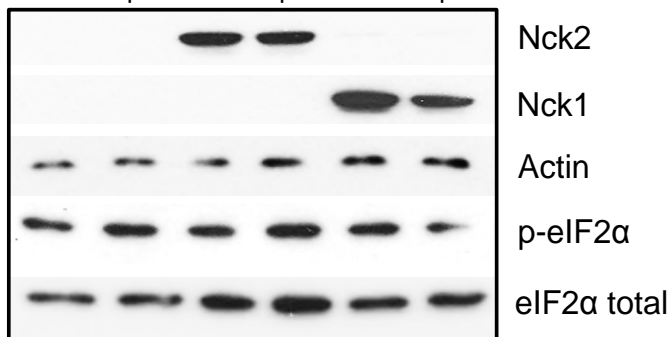

Supplement: MOESM5 [file 9464704]
